# Methicillin-Resistant *Staphylococcus capitis* with Reduced Vancomycin Susceptibility Causes Late-Onset Sepsis in Intensive Care Neonates

Jean-Philippe Rasigade<sup>1,2\*</sup>, Olivia Raulin<sup>2</sup>, Jean-Charles Picaud<sup>3</sup>, Charlotte Tellini<sup>2</sup>, Michele Bes<sup>1</sup>, Jacqueline Grando<sup>4</sup>, Mohamed Ben Saïd<sup>3</sup>, Olivier Claris<sup>5</sup>, Jerome Etienne<sup>1</sup>, Sylvestre Tigaud<sup>2</sup>, Frederic Laurent<sup>1,2</sup>

**1** INSERM U851, National Reference Center for Staphylococci, University of Lyon, Lyon, France, **2** Department of Clinical Microbiology, Northern Hospital Group, Hospices Civils de Lyon, Lyon, France, **3** Department of Neonatology, Northern Hospital Group, Hospices Civils de Lyon, Lyon, France, **4** Department of Hygiene and Epidemiology, Edouard Herriot Hospital Center, Hospices Civils de Lyon, Lyon, France, **5** Department of Neonatology, Eastern Hospital Group, Hospices Civils de Lyon, Lyon, France

## Abstract

**Background:** Coagulase-negative staphylococci, mainly *Staphylococcus epidermidis*, are the most frequent cause of late-onset sepsis (LOS) in the neonatal intensive care unit (NICU) setting. However, recent reports indicate that methicillin-resistant, vancomycin-heteroresistant *Staphylococcus capitis* could emerge as a significant pathogen in the NICU. We investigated the prevalence, clonality and vancomycin susceptibility of *S. capitis* isolated from the blood of NICU infants and compared these data to adult patients.

**Methodology/Principal Findings:** We conducted a retrospective laboratory-based survey of positive blood cultures in NICU infants  $\geq 3$  days of age ( $n = 527$ ) and in adult ICU patients  $\geq 18$  years of age ( $n = 1473$ ) who were hospitalized from 2004 to 2009 in two hospital centers in Lyon, France. *S. capitis* was the most frequent pathogen in NICU infants, ahead of *S. epidermidis* (39.1% vs. 23.5% of positive blood cultures, respectively). Conversely, *S. capitis* was rarely found in adult ICU patients (1.0%) compared to *S. epidermidis* (15.3%). *S. capitis* bloodstream isolates were more frequently resistant to methicillin when collected from NICU infants than from adult patients (95.6% vs. 53.3%, respectively). Furthermore, we collected and characterized 53 *S. capitis* bloodstream isolates from NICU infants and adult patients from six distant cities. All methicillin-resistant *S. capitis* isolates from NICU infants were clonally related as determined by pulsed-field gel electrophoresis. These isolates harbored a type V-related staphylococcal chromosomal cassette *mec* element, and constantly showed either vancomycin resistance (37.5%) or heteroresistance (62.5%). Conversely, the isolates that were collected outside of the NICU were genetically diverse and displayed much lower rates of vancomycin resistance and heteroresistance (7.7% and 23.1%, respectively).

**Conclusions/Significance:** A clonal population of methicillin-resistant *S. capitis* strains has spread into several French NICUs. These isolates exhibit reduced susceptibility to vancomycin, which is the most widely used antimicrobial agent in the NICU setting.

**Citation:** Rasigade J-P, Raulin O, Picaud J-C, Tellini C, Bes M, et al. (2012) Methicillin-Resistant *Staphylococcus capitis* with Reduced Vancomycin Susceptibility Causes Late-Onset Sepsis in Intensive Care Neonates. PLoS ONE 7(2): e31548. doi:10.1371/journal.pone.0031548

**Editor:** Herman Tse, The University of Hong Kong, Hong Kong

**Received:** June 16, 2011; **Accepted:** January 10, 2012; **Published:** February 14, 2012

**Copyright:** © 2012 Rasigade et al. This is an open-access article distributed under the terms of the Creative Commons Attribution License, which permits unrestricted use, distribution, and reproduction in any medium, provided the original author and source are credited.

**Funding:** This work was supported by the French Ministry of Health. The funder had no role in study design, data collection, analysis, decision to publish, or preparation of the manuscript.

**Competing Interests:** The authors have declared that no competing interests exist.

\* E-mail: jean-philippe.rasigade@chu-lyon.fr

## Introduction

Constant improvements in neonatal intensive care have led to better survival rates for very-low-birth-weight infants (VLBW, <1500 g), but the high incidence of nosocomial, late-onset sepsis (LOS, occurring after 3 days of age) is still a leading cause of morbidity and mortality [1,2]. Coagulase-negative staphylococci (CoNS) are the most frequently encountered pathogens in bloodstream infections in neonatal intensive care units (NICUs) [3,4]. Several risk factors for such infections have been identified, including low gestational age, low birth weight [5], parenteral nutrition with intravenous lipids, and the presence of a central

venous catheter [6,7]. Although CoNS bloodstream infections are significantly less severe than those caused by other pathogens [4], they lead to prolonged hospitalization and increased antibiotic use [4,8].

*Staphylococcus epidermidis* has been shown to be the predominant species in CoNS bacteremia in both adult and pediatric patients [9–12]; in the NICU setting, it represents 70% of CoNS isolates [12–15]. Among non-*epidermidis* CoNS, *Staphylococcus capitis* is rarely, if ever, isolated from bacteremic adult patients [16]. Although this species has been occasionally reported in infective endocarditis cases [17,18], it is most often considered to be a blood culture contaminant [16]. However, in the NICU setting, recent

studies have indicated that methicillin-resistant *S. capitis* could emerge as a significant pathogen, causing LOS in VLBW infants [14,19–22]. The high prevalence of methicillin-resistant CoNS in NICUs usually leads to frequent vancomycin use. Concerns have been raised about the spread of vancomycin-heteroresistant *S. capitis* strains in NICUs and their involvement in persistent bacteremia despite prolonged vancomycin therapy [19,20,23].

The unusually high prevalence of methicillin-resistant *S. capitis* bloodstream infections in the NICUs of the University Hospital of Lyon, France, prompted this study. The objectives were: (1) to describe the species distribution of bloodstream CoNS isolates in these NICUs; (2) to investigate the clonality of *S. capitis* that causes LOS in the NICUs of Lyon, and compare it to *S. capitis* strains found in adult patients and in other French NICUs; and (3) to investigate vancomycin resistance and heteroresistance in these strains.

## Methods

### Retrospective prevalence study

We conducted a retrospective laboratory-based survey of blood cultures at two NICUs located in two different hospital centers within the University Hospital of Lyon, France. Both NICUs provide third-level neonatal care, with approximately 70% (Northern Hospital Group) and 55% (Eastern Hospital Group) of infants having VLBW. The inclusion period was from January 1, 2004 to December 31, 2009. The microbiological records of blood cultures drawn from NICU infants after the third day of life (to exclude early-onset sepsis) were obtained from the computerized databases of the clinical microbiology laboratories of each hospital. For comparison purposes, the blood culture results of patients over 18 years of age who were hospitalized in the ICUs of these hospitals during the study period were also reviewed. The first positive blood culture result from each patient was considered for analysis. We also determined the number of patients who had different blood cultures positive with different pathogens. Both participating microbiology laboratories performed species-level identification of the bacterial isolates and antimicrobial susceptibility testing (AST) with the automated BD Phoenix system (Becton Dickinson, Sparks, MD). The AST results were interpreted according to the recommendations of the French Society for Microbiology [24].

Because the study was laboratory-based and no clinical data were obtained, CoNS-positive blood cultures were interpreted to be probable or possible CoNS bacteremia based on the number of positive blood cultures and the patient setting (i.e., NICU infants or adult ICU patients). In both NICU infants and adult ICU patients, probable CoNS bacteremia was defined as  $\geq 2$  blood culture sets positive with the same CoNS species within a 3-day period [25]. CoNS-positive blood cultures in adult ICU patients that did not match these criteria were excluded ( $n = 585$ ). However, because repeated blood cultures are not frequently performed in NICU infants compared to adult patients, single CoNS-positive blood cultures in NICU infants were interpreted as possible CoNS bacteremia and included for analysis. Seventeen CoNS-positive blood cultures were excluded because they were explicitly recorded as false positives in the microbiological record, and thus not identified at the species level. Finally, we excluded blood cultures that were positive with organisms considered to be contaminants other than CoNS, including *Bacillus* spp. ( $n = 4$  NICU infants and 10 ICU patients) and *Micrococcus* spp. ( $n = 1$  NICU infant and 11 ICU patients).

The resistance patterns of *S. capitis* to penicillin, methicillin, gentamicin, erythromycin, clindamycin, pristinamycin, rifampin,

fusidic acid and fluoroquinolones were recorded and compared between NICU and adult ICU isolates. Two records were excluded because AST results were incomplete and the corresponding isolates could not be recovered from the strain collection of the microbiology laboratory. The results regarding vancomycin susceptibility were excluded from the analysis because the  $\leq 4$  mg/L clinical breakpoint used during the 2004–2009 inclusion period differed from the  $\leq 2$  mg/L clinical breakpoint recommended since 2010 by the European Committee on Antimicrobial Susceptibility Testing (EUCAST) [26]. Because the study consisted of a retrospective review of routine microbiological data that were analyzed anonymously, approval by the ethics committee and informed consent were not required.

### *S. capitis* isolates

To investigate the population structure of *S. capitis* at the regional level, *S. capitis* isolates were collected retrospectively among routinely stored clinical strains from participating centers in distant cities spanning the French territory, namely Caen, Limoges, Lyon, Saint-Etienne, Troyes and Versailles. In each laboratory, all bloodstream isolates with the exception of isolates interpreted as contaminants were stored regardless of their resistance profile, according to the French guidelines on bacterial strain storage [27]. *S. capitis* bloodstream isolates from NICU infants and adult/older pediatric patients regardless of their methicillin resistance status were included. The inclusion period was from January 2006 to April 2009 for the isolates collected from the Northern Hospital Group of Lyon, and from January 2008 to April 2009 for the isolates collected from the other participating centers because of the shorter duration of routine storage of clinical strains in these laboratories. Because the strain collection at Lyon consisted of a large number of *S. capitis* NICU isolates ( $n = 125$ ), selection was restricted to 25 isolates using a random sampling algorithm without replacement by means of the XLStat software version 7.5.2 (Addinsoft SARL, Paris, France). Additionally, an *S. capitis* strain that was involved in a previously reported *S. capitis* outbreak at the NICU of Nantes from 2000 to 2003 was kindly provided by J. Caillon and also included in the study [22]. A total of 53 isolates were investigated, including 40 isolates from NICU infants (Lyon,  $n = 25$ ; Limoges,  $n = 7$ ; Saint-Etienne,  $n = 3$ ; Caen,  $n = 2$ ; Troyes,  $n = 2$ ; and Nantes,  $n = 1$ ) and 13 isolates from adult/older pediatric patients (Lyon,  $n = 12$ ; and Versailles,  $n = 1$ ). Species-level identification of all *S. capitis* isolates included in this study was confirmed by amplification and sequence analysis of the *tuf* gene as previously described [28].

### Pulsed-field gel electrophoresis

All *S. capitis* isolates ( $n = 53$ ) were characterized by PFGE as previously described [29]. Genomic DNA was digested with *Sma*I restriction endonuclease, which discriminates well between staphylococci, including *S. capitis* [30]. After staining with ethidium bromide, electrophoresis gels were photographed and analyzed with GelCompar software version 4.1 (Applied Math NV, Saint-Martens-Latem, Belgium) using the unweighted pair group method with arithmetic mean (UPGMA). The Dice correlation coefficient was used to determine the similarity percentage between DNA restriction patterns, which were assigned to pulsotypes using  $>80\%$  similarity with a band position tolerance of 1% as previously described [31]. The genetic diversity of the isolates from NICU infants was compared with the isolates from adult/older pediatric patients using Simpson's index of diversity (SID), which is defined as the percentage probability that two isolates chosen at random are unrelated [32].

### Methicillin resistance and staphylococcal chromosomal cassette *mec* typing

The susceptibility of the 53 selected isolates to oxacillin and cefoxitin was determined by the standard agar diffusion technique as recommended by the French Society for Microbiology [24]. SCC*mec* typing was performed on a subset of 23 methicillin-resistant isolates representative of each pulsotype and geographic origin. Multiplex PCRs were performed to determine the allelic variants of both the chromosomal recombinase *ccr* gene complex cassette and the *mec* locus according to the method established by Kondo et al. [33]. Each combination of *ccr* and *mec* alleles was related to an SCC*mec* type when applicable, following the recommendations of the International Working Group on the Classification of Staphylococcal Cassette Chromosome Elements (IWG-SCC) [34].

### Vancomycin resistance and heteroresistance testing

Vancomycin minimum inhibitory concentrations (MICs) were determined using the E-Test method (AB Biodisk, Solna, Sweden) with a McFarland density 0.5 inoculum on Mueller-Hinton agar as recommended by the manufacturer. The E-Test method was preferred to the CLSI broth microdilution reference method because of its better performance at detecting staphylococci with reduced vancomycin susceptibility [35,36]. Strains exhibiting a vancomycin MIC > 2 mg/L were considered to be resistant according to EUCAST breakpoints [26]. Strains with a vancomycin MIC ≤ 2 mg/L were tested for vancomycin heteroresistance using the brain heart infusion (BHI) screen agar method as previously described [37]. Briefly, an overnight blood agar plate culture was suspended in 0.9% saline and adjusted to McFarland 0.5 turbidity. Four 10-μL droplets of the suspension were dropped using a pipette onto a BHI agar plate (Difco, Becton Dickinson) containing 16 g/L pancreatic digest of casein (Bacto, Becton Dickinson) and 4 μg/mL vancomycin. Plates were incubated at 35°C and the colonies in each droplet were counted after 48 h. A strain was considered to be heteroresistant to vancomycin if ≥ 1 droplet had ≥ 2 colonies. The vancomycin-susceptible *S. aureus* strain ATCC 29213 was used as a negative control [37]. The vancomycin-heteroresistant *S. aureus* strain Mu3 and the vancomycin-resistant *S. aureus* strain Mu50 were used as positive controls [38]. The results from each experiment were recorded only when positive and negative controls were confirmed.

### Statistical analysis

The differences in the prevalence of each bacterial species in the positive blood cultures between patient groups and in the antimicrobial resistance rates were analyzed using a two-tailed Fisher's exact test. *P* values were corrected for multiple testing using the Holm-Bonferroni method where appropriate. The differences in vancomycin MICs were analyzed using a non-parametric two-tailed Mann-Whitney *U*-test. *P* values of ≤ 0.05 were considered to be statistically significant. All statistical tests were performed using the XLStat software version 7.5.2.

## Results

### Methicillin-resistant *S. capitis* is the leading cause of LOS in NICU infants

In total, 2,628 patients with positive blood cultures were identified from the laboratory databases, and 2,000 cases were included in the final analysis (Fig. 1). Blood cultures were more likely to grow CoNS when drawn from NICU infants than from adult ICU patients (*P* < 0.001, two-tailed Fisher's exact test with

Holm-Bonferroni correction; Table 1). *S. capitis* was the most prevalent pathogen that caused bloodstream infections in NICU infants (39.1%) but accounted for only 1.0% of positive blood cultures from adult ICU patients (*P* < 0.001). Overall, 54 out of 206 (26.2%) *S. capitis*-positive blood cultures from NICU infants fulfilled the definition for probable CoNS sepsis (≥ 2 blood culture sets were positive with the same species within a 3-day period), and 152 (73.8%) blood cultures were thus considered to be possible *S. capitis* sepsis. These proportions did not differ significantly from the non-*capitis* CoNS-positive blood cultures (probable sepsis, *n* = 41/210, 19.5%; possible sepsis, *n* = 169/210, 80.5%; *P* = 0.13). There was no significant evolution of *S. capitis* prevalence from 2004 to 2009 in either group of patients (data not shown).

The overall proportion of patients who had ≥ 2 blood cultures positive with ≥ 2 different pathogens was significantly lower in NICU infants than adult ICU patients (*n* = 177/527, 33.6%, vs. *n* = 960/1473, 65.2%, respectively; *P* < 0.001). Among patients whose first positive blood culture grew *S. capitis*, NICU infants were significantly less likely than adult ICU patients to have subsequent blood cultures positive with another pathogen (*n* = 49/206, 23.8%, vs. *n* = 8/15, 53.3%, respectively; *P* = 0.03). Finally, among patients whose first positive blood culture grew a pathogen other than *S. capitis*, NICU infants were significantly more likely than adult ICU patients to have subsequent blood cultures positive with *S. capitis* (*n* = 42/321, 13.1%, vs. *n* = 16/1458, 1.1%, respectively; *P* < 0.001).

The antimicrobial resistance patterns of *S. capitis* bloodstream isolates from NICU infants (*n* = 204) and adult ICU patients (*n* = 15) were compared. The isolates exhibited specific antimicrobial susceptibility patterns depending on the patient setting (Table 2). NICU isolates were more frequently resistant to beta-lactams and gentamicin (*P* < 0.001) than adult ICU isolates and more frequently susceptible to erythromycin and fluoroquinolones (*P* < 0.05). Among the NICU isolates, the methicillin-resistant isolates were more frequently resistant to gentamicin (*P* < 0.001), and more frequently susceptible to fusidic acid than were methicillin-susceptible isolates (*P* < 0.05; Table 3).

### *S. capitis* isolates from distant NICUs are clonal and harbor a type V-related SCC*mec* element

Of 53 selected isolates, 49 (92.5%) were resistant to methicillin, including 39 NICU isolates (97.5%) and 10 non-NICU isolates (76.9%). PFGE identified 13 different pulsotypes, designated as NRCS-A to -M (Fig. 2). Except for a single methicillin-susceptible isolate, all NICU isolates that were collected from 7 different NICUs in 6 different cities belonged to the same pulsotype (NRCS-A). In contrast, the 14 remaining isolates, including 1 methicillin-susceptible NICU isolate and 13 isolates from adult or older pediatric patients, belonged to 13 different pulsotypes (NRCS-A to -M). The only NRCS-A isolate that was not from a NICU infant was collected from a 4-year-old patient who was hospitalized in the pediatric ICU of Lyon. Simpson's index of diversity was 4.9% (95% CI, 0.0–14.3%) for the NICU isolates and 91.1% (95% CI, 88.0–94.2%) for the adult/older pediatric isolates.

SCC*mec* typing was applied to a subset of 23 methicillin-resistant *S. capitis* isolates representative of each pulsotype and geographic origin, and all NRCS-A isolates were found to share the *mec* complex C and *ccr* C genes, whose combination matches the features of SCC*mec* type V (Fig. 2) [34]. The same *mec* complex/*ccr* gene combination was only found in one pulsotype NRCS-G isolate from an adult patient from Versailles. The 7 remaining methicillin-resistant isolates from adult patients belonged to pulsotypes NRCS-D, -E, and -H to -L and were found to harbor

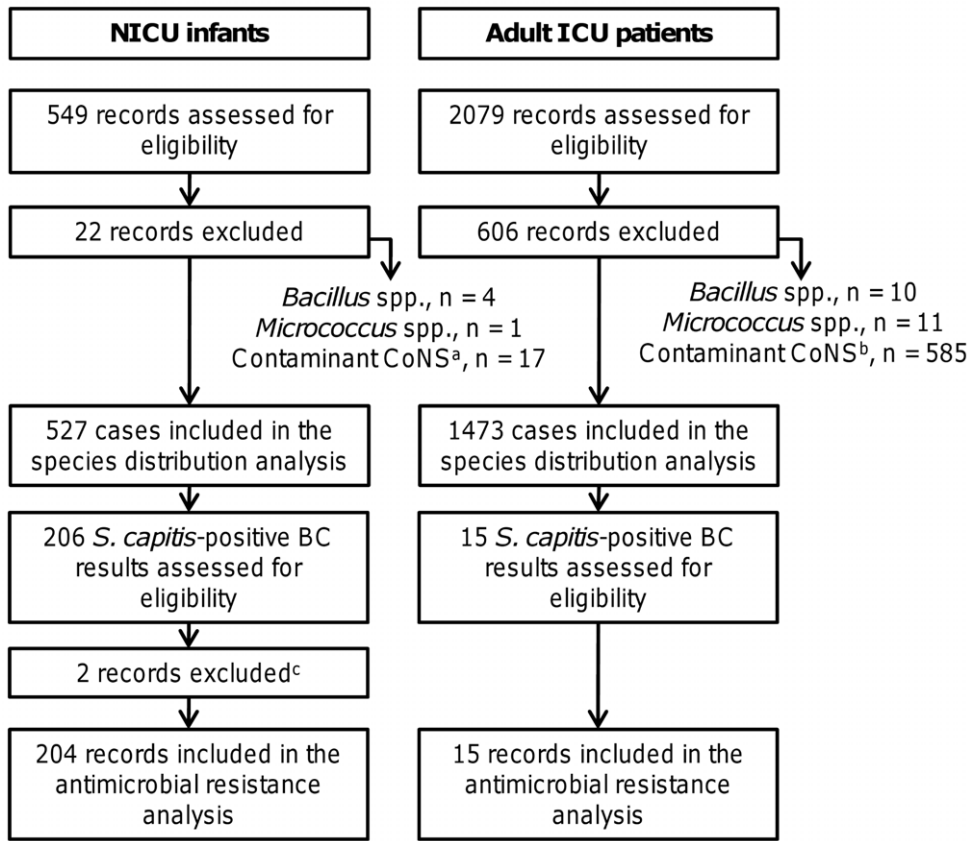

**Figure 1. Flow diagram of case selection.** (N)ICU, (neonatal) intensive care unit; CoNS, coagulase-negative staphylococci; BC, blood culture. <sup>a</sup>In NICU infants, a single CoNS-positive blood culture was interpreted as possible bacteremia and included in the analysis. The CoNS-positive results that were excluded were explicitly recorded as a contaminant in the microbiology record. <sup>b</sup>In adult patients, a single CoNS-positive blood culture was interpreted as a contaminant and excluded from the analysis. <sup>c</sup>Records were excluded when antimicrobial susceptibility results were not available. doi:10.1371/journal.pone.0031548.g001

either the *mec* complex B/*ccr* A2B2 (matching SCC*mec* IV) or the *mec* complex C/*ccr* A2B2C (a combination that has not yet been assigned to an SCC*mec* type to our knowledge).

#### NRCS-A isolates have reduced vancomycin susceptibility

The mean vancomycin MIC of NRCS-A isolates was significantly higher (2.8 mg/L, range 1.5–12 mg/L) than the NRCS-B to -M isolates (1.7 mg/L, range 1–4 mg/L;  $P < 0.01$ ,

two-tailed Mann-Whitney *U*-test) (Fig. 3). Regarding vancomycin susceptibility, as interpreted using the EUCAST 2010 recommendations [39], the proportion of vancomycin-resistant isolates was 4.9-fold higher in pulsotype NRCS-A than in the other pulsotypes (37.5% vs. 7.7%, respectively;  $P = 0.08$ , Fisher's exact test). Moreover, the proportion of vancomycin-heteroresistant isolates was 2.7-fold higher in NRCS-A than in the other pulsotypes (62.5% vs. 23.1%, respectively;  $P < 0.05$ ). All NRCS-A isolates with

**Table 1. A species distribution comparison of *Staphylococcus* spp. isolates from the positive blood cultures of patients in neonatal intensive care units (NICUs) and adult ICUs, 2004–2009.**

| Blood culture result             | No. (%) of blood cultures (one per patient) |                    |  | <i>P</i> value <sup>a</sup> | Odds ratio (95% CI) |
|----------------------------------|---------------------------------------------|--------------------|--|-----------------------------|---------------------|
|                                  | NICU infants                                | Adult ICU patients |  |                             |                     |
| Total                            | 527                                         | 1473               |  |                             |                     |
| <i>S. aureus</i>                 | 65 (12.3)                                   | 166 (11.3)         |  | 0.525                       | 1.11 (0.82–1.50)    |
| Coagulase-negative staphylococci | 416 (78.9)                                  | 331 (22.5)         |  | <0.001                      | 12.9 (10.1–16.5)    |
| <i>S. epidermidis</i>            | 124 (23.5)                                  | 226 (15.3)         |  | <0.001                      | 1.70 (1.33–2.17)    |
| <i>S. capitis</i>                | 206 (39.1)                                  | 15 (1.0)           |  | <0.001                      | 62.4 (36.4–106.8)   |
| Other CoNS species               | 86 (16.3)                                   | 90 (6.1)           |  | <0.001                      | 3.00 (2.19–4.10)    |

<sup>a</sup>The differences between the groups were tested for statistical significance using a two-tailed Fisher's exact test. *P* values were corrected for multiple testing using the Holm-Bonferroni method.

doi:10.1371/journal.pone.0031548.t001

**Table 2.** A retrospective comparison of the antimicrobial resistance profiles of *Staphylococcus capitis* bloodstream isolates from patients in neonatal intensive care units (NICUs) and adult ICUs, 2004–2009.

| Antimicrobial agent | No. (%) of resistant isolates |                             | P value <sup>a</sup> | Odds ratio (95% CI) |
|---------------------|-------------------------------|-----------------------------|----------------------|---------------------|
|                     | NICU isolates (n = 204)       | Adult ICU isolates (n = 15) |                      |                     |
| Penicillin          | 202 (99.0)                    | 10 (66.7)                   | <0.001               | 50.5 (8.70–293.1)   |
| Methicillin         | 195 (95.6)                    | 8 (53.3)                    | <0.001               | 19.0 (5.63–63.9)    |
| Gentamicin          | 194 (95.1)                    | 3 (20.0)                    | <0.001               | 77.6 (18.8–319.7)   |
| Erythromycin        | 29 (14.2)                     | 7 (46.7)                    | 0.022                | 0.19 (0.06–0.56)    |
| Clindamycin         | 21 (10.3)                     | 4 (26.7)                    | 0.227                | 0.32 (0.09–1.08)    |
| Pristinamycin       | 13 (6.4)                      | 1 (6.7)                     | 1.000                | 0.95 (0.12–7.82)    |
| Rifampin            | 91 (44.6)                     | 3 (20.0)                    | 0.205                | 3.22 (0.88–11.8)    |
| Fusidic acid        | 11 (5.4)                      | 4 (26.7)                    | 0.050                | 0.16 (0.04–0.57)    |
| Fluoroquinolones    | 10 (4.9)                      | 7 (46.7)                    | <0.001               | 0.06 (0.02–0.20)    |

<sup>a</sup>The differences between the groups were tested for statistical significance using a two-tailed Fisher's exact test. P values were corrected for multiple testing using the Holm-Bonferroni method.  
doi:10.1371/journal.pone.0031548.t002

a vancomycin MIC in the susceptible range were heteroresistant. Finally, the proportion of isolates exhibiting either vancomycin resistance or heteroresistance was significantly higher in pulsotype NRCS-A than in the other pulsotypes (100.0% vs. 30.8%, respectively;  $P < 0.001$ ).

## Discussion

Several major findings emerged from this retrospective study of 2,000 positive blood cultures from NICU infants and adult ICU patients from 2004 to 2009 and from the molecular characterization of a panel of *S. capitis* clinical isolates. First, methicillin-resistant *S. capitis* was the most prevalent pathogen that caused LOS in the NICUs of Lyon, France, whereas this species was rarely isolated from the blood of adult ICU patients. Second, all methicillin-resistant *S. capitis* bloodstream isolates collected from several NICUs spanning the French territory belonged to the same

pulsotype, which was designated as pulsotype NRCS-A, whereas the methicillin-susceptible isolates and the isolates from adult and older pediatric patients exhibited high genetic diversity. Third, pulsotype NRCS-A isolates constantly showed either vancomycin resistance (37.5%) or heteroresistance (62.5%), whereas these rates were 4.9- and 2.7-fold, respectively, lower in the isolates collected outside of the NICU. Collectively, these findings indicate that a clonal population of methicillin-resistant *S. capitis* exhibiting reduced susceptibility to vancomycin has spread into several NICUs in France.

*S. capitis* has been sporadically incriminated in NICU outbreaks [22], but the prevalence of this pathogen as a cause of LOS in French NICUs had not been investigated prior to this study. Several surveillance programs, such as RAISIN and NEOCAT [40,41], have focused on healthcare-associated bloodstream infections in French ICUs and NICUs. However, *S. capitis* prevalence could not be inferred from the results of these studies because CoNS prevalence was not reported at the species level.

**Table 3.** A retrospective comparison of the antimicrobial resistance profiles of methicillin-resistant and methicillin-susceptible *Staphylococcus capitis* bloodstream isolates from patients in neonatal intensive care units, 2004–2009.

| Antimicrobial agent | No. (%) of resistant isolates            |                                          | P value <sup>a</sup> | Odds ratio (95% CI) |
|---------------------|------------------------------------------|------------------------------------------|----------------------|---------------------|
|                     | Methicillin-resistant isolates (n = 195) | Methicillin-susceptible isolates (n = 9) |                      |                     |
| Penicillin          | 195 (100.0)                              | 7 (77.8)                                 | <0.001               | NC <sup>b</sup>     |
| Gentamicin          | 192 (98.5)                               | 2 (22.2)                                 | <0.001               | 224.0 (32.1–1561.3) |
| Erythromycin        | 27 (13.8)                                | 2 (22.2)                                 | 1.000                | 0.56 (0.11–2.85)    |
| Clindamycin         | 21 (10.8)                                | 0 (0.0)                                  | 1.000                | NC                  |
| Pristinamycin       | 13 (6.7)                                 | 0 (0.0)                                  | 1.000                | NC                  |
| Rifampin            | 89 (45.6)                                | 2 (22.2)                                 | 0.966                | 2.94 (0.60–14.5)    |
| Fusidic acid        | 8 (4.1)                                  | 3 (33.3)                                 | 0.049                | 0.09 (0.02–0.41)    |
| Fluoroquinolones    | 10 (5.1)                                 | 0 (0.0)                                  | 1.000                | NC                  |

<sup>a</sup>The differences between the groups were tested for statistical significance using a two-tailed Fisher's exact test. P values were corrected for multiple testing using the Holm-Bonferroni method.

<sup>b</sup>NC, not calculable.

doi:10.1371/journal.pone.0031548.t003

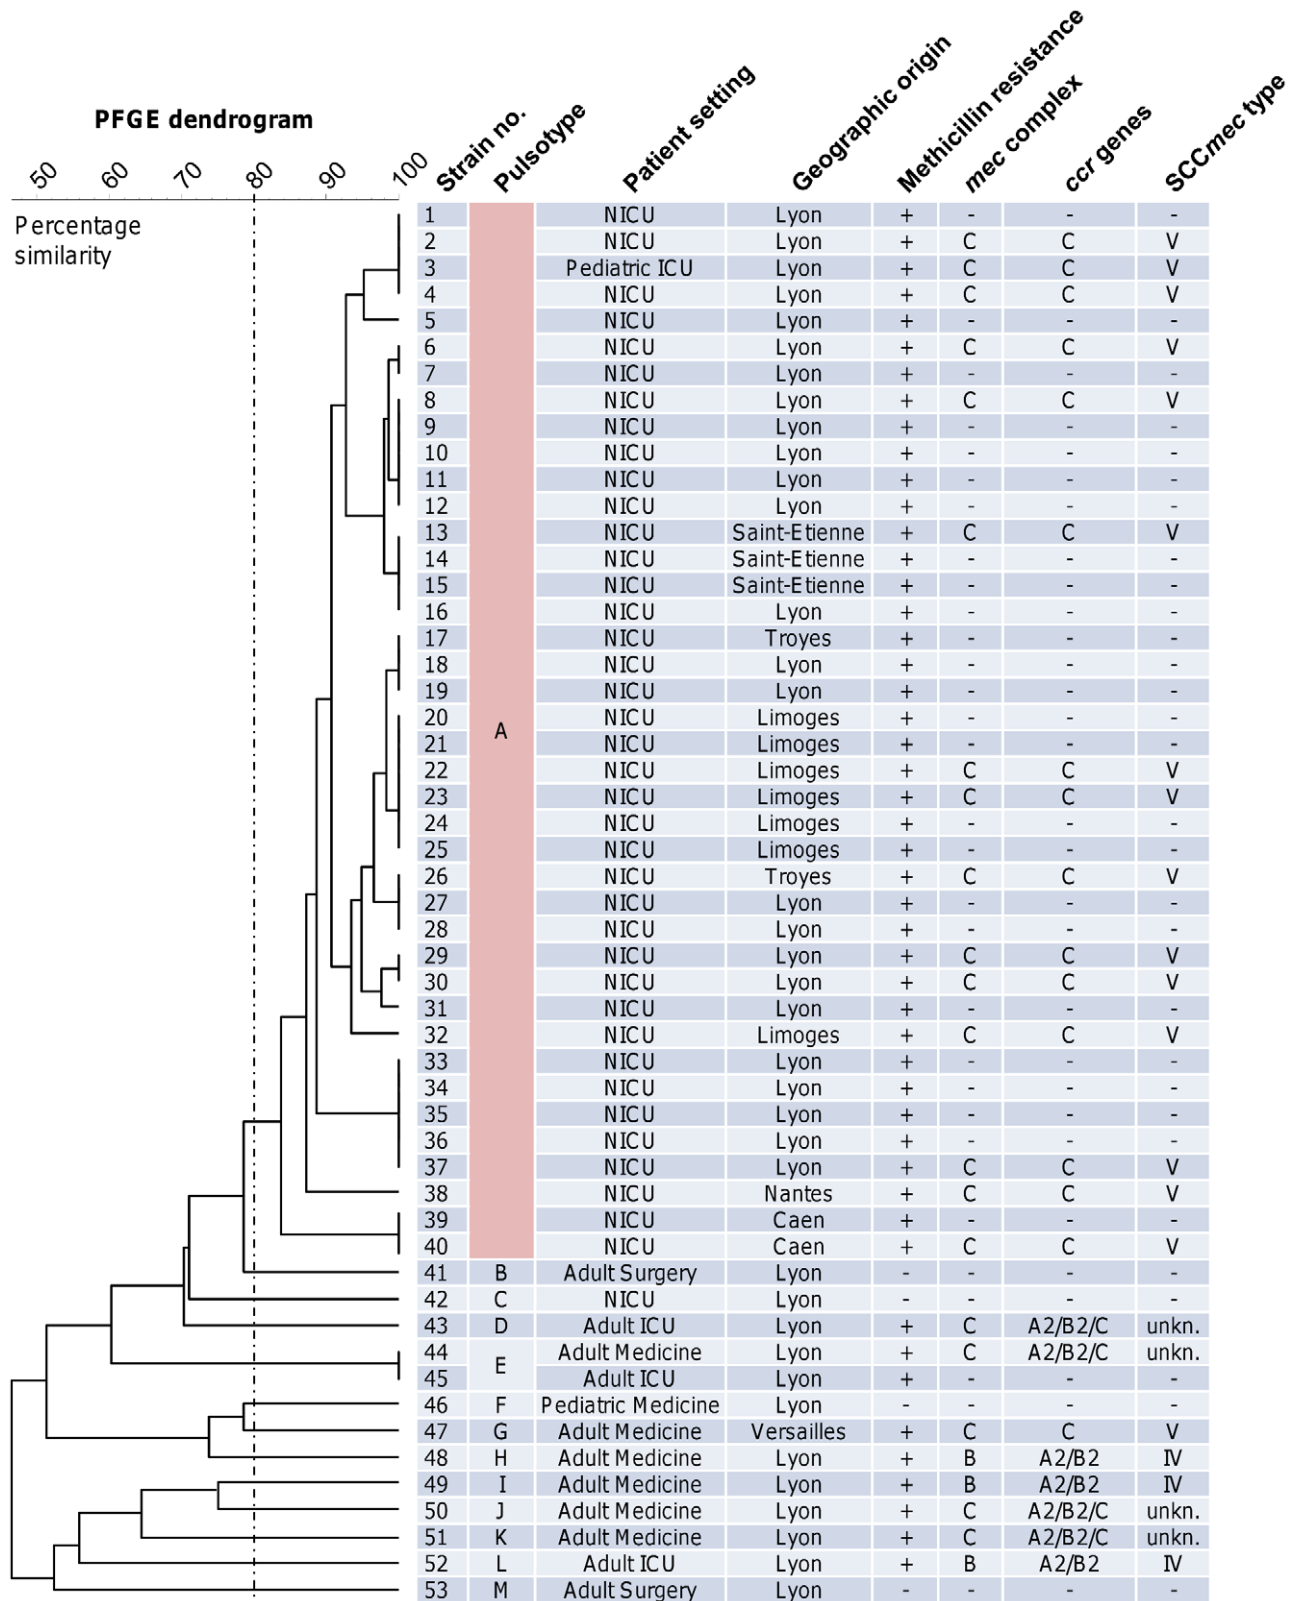

**Figure 2. *Staphylococcus capitis* isolates from distant neonatal intensive care units (NICUs) are clonal.** Pulsed-field gel electrophoresis (PFGE) was applied to 53 bloodstream isolates of *S. capitis* that were collected from NICU infants and adult patients from cities spanning the French territory. The PFGE dendrogram was generated using the GelCompar software version 4.1. The isolates were assigned to pulsotypes using >80% similarity (vertical dashed line). Staphylococcal chromosomal cassette *mec* (SCCmec) typing was applied to 23 methicillin-resistant isolates representative of each pulsotype and geographic origin. All methicillin-resistant isolates from the different NICUs belonged to the same pulsotype and shared a type V-related SCCmec element, whereas methicillin-susceptible and/or non-NICU isolates were genetically diverse. *ccr*, chromosomal cassette recombinase; unkn., unknown (a combination of the *mec* complex and *ccr* genes has not been assigned to an SCCmec type so far). doi:10.1371/journal.pone.0031548.g002

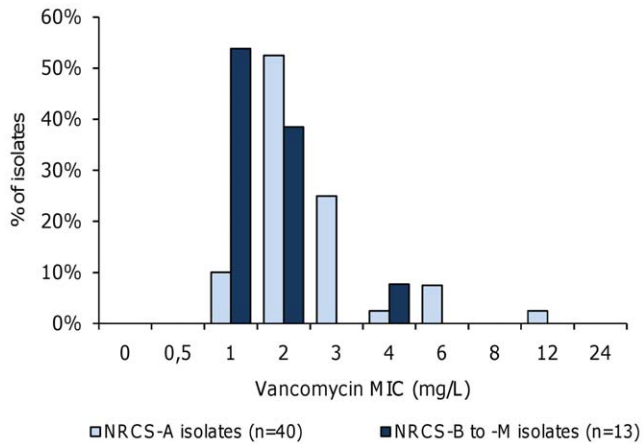

**Figure 3. Vancomycin MICs are higher in *Staphylococcus capitis* pulsotype NRCS-A than in other pulsotypes.** Vancomycin MICs were determined by the E-Test method. The mean vancomycin MIC was significantly higher in pulsotype NRCS-A isolates (2.8 mg/L) than in pulsotypes NRCS-B to -M isolates (1.7 mg/L), as illustrated by the shift toward the higher values of the MIC distribution curve ( $P < 0.01$ , two-tailed Mann-Whitney *U*-test). doi:10.1371/journal.pone.0031548.g003

Interestingly, previous reports of *S. capitis* in the NICU setting have shown strains of this species to be clustered in a single pulsotype [13,42]. It is unknown whether the spread of *S. capitis* NRCS-A is limited to France or if these strains are present in the NICUs of other countries. Molecular typing and a comparison of the isolates from international sources are warranted to address this question.

The reasons underlying the success of *S. capitis* pulsotype NRCS-A in the NICU environment are not completely understood. NICU isolates were found to be specifically resistant to the antimicrobial agents used in these wards, namely beta-lactams, aminosides and vancomycin [43], but not fluoroquinolones (Table 2). This adapted resistance profile likely results from a slow and progressive expansion of this clone in NICUs rather than from a rapid epidemic spread. Heteroresistance to vancomycin has been proposed as an intrinsic feature of the *S. capitis* species [23]. An increased tendency towards vancomycin resistance in pulsotype NRCS-A isolates may have been a decisive feature that led to their selection under high vancomycin pressure in the NICUs.

Whether *S. capitis* LOS in NICU infants is associated with higher morbidity or treatment failure compared to other CoNS pathogens is unknown. The present study was specifically designed to address the prevalence and molecular characteristics of *S. capitis* in the NICUs; therefore, we did not investigate the clinical course of *S. capitis* bacteremia. Our findings suggest the need for a prospective cohort study to determine whether specific risk factors are associated with LOS due to *S. capitis* and to what extent

elevated vancomycin MICs in this pathogen correlate with an impaired response to glycopeptide therapy.

Our study has limitations in addition to those inherent to its retrospective design that need to be addressed. First, we used laboratory-based definitions of CoNS bacteremia in NICU infants, which determined that one CoNS-positive blood culture was considered to be bacteremic in this population. It is likely that a non-negligible proportion of CoNS-positive blood cultures included in the analysis were false-positive, thus introducing a bias towards an overestimation of CoNS prevalence as a cause of bacteremia. Nonetheless, it is unlikely that the large difference in *S. capitis* prevalence between NICU and adult ICU patients can be explained by this inclusion bias. Second, although we have shown that the *S. capitis* pulsotype NRCS-A is present in the NICUs of several French cities, our prevalence study was limited to the NICUs of a single town; therefore, it does not necessarily reflect the regional epidemiology of *S. capitis*. Third, the over-representation of isolates from Lyon in our collection introduces a potential underestimation of genetic diversity. However, because all of the NICU isolates collected outside of Lyon belonged to pulsotype NRCS-A, we can reasonably conclude that this sampling bias does not account for the observed clonality of *S. capitis* in the NICUs. Finally, one cannot exclude the possibility that this clonality resulted from a lack of discriminatory power of *Sma*I PFGE regarding the *S. capitis* species, but the high diversity of the PFGE banding patterns in the isolates from adult patients does not support this hypothesis. Furthermore, additional typing of a subset of NRCS-A isolates from different cities using repetitive sequence-based PCR [44] yielded indistinguishable banding patterns (data not shown) that confirmed the close genetic relationship between these isolates.

To conclude, the *S. capitis* pulsotype NRCS-A has adapted remarkably to the NICU setting; it has overtaken *S. epidermidis* as the leading pathogen that causes LOS in the NICUs of Lyon while remaining virtually absent from adult patients. Microbiologists and physicians in NICUs with high *S. capitis* prevalence should be aware of the potential reduced vancomycin susceptibility of this pathogen.

## Acknowledgments

We would like to thank microbiologists J. Caillon, F. Garnier, V. Cattoir, N. Fonsale, C. Eloy, B. Pangon and S. Bonacorsi for sending us the *S. capitis* isolates; R. Buffin, M. Bonfils, K. Bellemin, D. Fournier, E. Salavert, O. Dumitrescu, M-E. Reverdy, O. Dauwalder, H. Meugnier, H. Salord and C. Roure-Sobas for their helpful advice; and S. Trouillet, C. Courtier, C. Gardon, C. Bouveyron and C. Spinelli for their technical help.

## Author Contributions

Conceived and designed the experiments: JPR OR ST FL. Performed the experiments: OR JPR MB CT. Analyzed the data: JPR OR FL. Contributed reagents/materials/analysis tools: ST JE. Wrote the paper: JPR FL JE JCP OC. Collected the retrospective data: ST JCP JG MBS OC.

## References

- Brodie SB, Sands KE, Gray JE, Parker RA, Goldmann DA, et al. (2000) Occurrence of nosocomial bloodstream infections in six neonatal intensive care units. *Pediatr Infect Dis J* 19: 56–65.
- Stoll BJ, Gordon T, Korones SB, Shankaran S, Tyson JE, et al. (1996) Late-onset sepsis in very low birth weight neonates: a report from the National Institute of Child Health and Human Development Neonatal Research Network. *J Pediatr* 129: 63–71.
- Gaynes RP, Edwards JR, Jarvis WR, Culver DH, Tolson JS, et al. (1996) Nosocomial infections among neonates in high-risk nurseries in the United States. National Nosocomial Infections Surveillance System. *Pediatrics* 98: 357–361.
- Stoll BJ, Hansen N, Fanaroff AA, Wright LL, Carlo WA, et al. (2002) Late-onset sepsis in very low birth weight neonates: the experience of the NICHD Neonatal Research Network. *Pediatrics* 110: 285–291.
- Gray JE, Richardson DK, McCormick MC, Goldmann DA (1995) Coagulase-negative staphylococcal bacteremia among very low birth weight infants: relation to admission illness severity, resource use, and outcome. *Pediatrics* 95: 225–230.
- Freeman J, Goldmann DA, Smith NE, Sidebottom DG, Epstein MF, et al. (1990) Association of intravenous lipid emulsion and coagulase-negative staphylococcal bacteremia in neonatal intensive care units. *N Engl J Med* 323: 301–308.

7. Johnson-Robbins LA, el-Mohandes AE, Simmens SJ, Keiser JF (1996) *Staphylococcus epidermidis* sepsis in the intensive care nursery: a characterization of risk associations in infants <1,000 g. *Biol Neonate* 69: 249–256.
8. Freeman J, Epstein MF, Smith NE, Platt R, Sidebottom DG, et al. (1990) Extra hospital stay and antibiotic usage with nosocomial coagulase-negative staphylococcal bacteremia in two neonatal intensive care unit populations. *Am J Dis Child* 144: 324–329.
9. Kirchhoff LV, Sheagren JN (1985) Epidemiology and clinical significance of blood cultures positive for coagulase-negative *Staphylococcus*. *Infect Control* 6: 479–486.
10. Kim SD, McDonald LC, Jarvis WR, McAllister SK, Jerris R, et al. (2000) Determining the significance of coagulase-negative staphylococci isolated from blood cultures at a community hospital: a role for species and strain identification. *Infect Control Hosp Epidemiol* 21: 213–217.
11. Herwaldt LA, Geiss M, Kao C, Pfaller MA (1996) The positive predictive value of isolating coagulase-negative staphylococci from blood cultures. *Clin Infect Dis* 22: 14–20.
12. Klingenberg C, Ronnestad A, Anderson AS, Abrahamsen TG, Zorman J, et al. (2007) Persistent strains of coagulase-negative staphylococci in a neonatal intensive care unit: virulence factors and invasiveness. *Clin Microbiol Infect* 13: 1100–1111.
13. Bradford R, Abdul Manan R, Daley AJ, Pearce C, Ramalingam A, et al. (2006) Coagulase-negative staphylococci in very-low-birth-weight infants: inability of genetic markers to distinguish invasive strains from blood culture contaminants. *Eur J Clin Microbiol Infect Dis* 25: 283–290.
14. de Silva GD, Kantzanou M, Justice A, Massey RC, Wilkinson AR, et al. (2002) The *ica* operon and biofilm production in coagulase-negative staphylococci associated with carriage and disease in a neonatal intensive care unit. *J Clin Microbiol* 40: 382–388.
15. Klingenberg C, Sundsfjord A, Ronnestad A, Mikalsen J, Gaustad P, et al. (2004) Phenotypic and genotypic aminoglycoside resistance in blood culture isolates of coagulase-negative staphylococci from a single neonatal intensive care unit, 1989–2000. *J Antimicrob Chemother* 54: 889–896.
16. Ruhe J, Menon A, Mushatt D, DeJace P, Hasbun R (2004) Non-epidemic coagulase-negative staphylococcal bacteremia: clinical predictors of true bacteremia. *Eur J Clin Microbiol Infect Dis* 23: 495–498.
17. Nalmas S, Bishburg E, Meurillio J, Khoobiar S, Cohen M (2008) *Staphylococcus capitis* prosthetic valve endocarditis: report of two rare cases and review of literature. *Heart Lung* 37: 380–384.
18. Cone LA, Sontz EM, Wilson JW, Mitruka SN (2005) *Staphylococcus capitis* endocarditis due to a transvenous endocardial pacemaker infection: case report and review of *Staphylococcus capitis* endocarditis. *Int J Infect Dis* 9: 335–339.
19. Ng PC, Chow VC, Lee CH, Ling JM, Wong HL, et al. (2006) Persistent *Staphylococcus capitis* septicemia in a preterm infant. *Pediatr Infect Dis J* 25: 652–654.
20. Van Der Zwet WC, Debets-Ossenkopp YJ, Reinders E, Kapi M, Savelkoul PH, et al. (2002) Nosocomial spread of a *Staphylococcus capitis* strain with heteroresistance to vancomycin in a neonatal intensive care unit. *J Clin Microbiol* 40: 2520–2525.
21. Wang SM, Liu CC, Tseng HW, Yang YJ, Lin CH, et al. (1999) *Staphylococcus capitis* bacteremia of very low birth weight premature infants at neonatal intensive care units: clinical significance and antimicrobial susceptibility. *J Microbiol Immunol Infect* 32: 26–32.
22. Gras-Le Guen C, Fournier S, Andre-Richet B, Caillon J, Chamoux C, et al. (2007) Almond oil implicated in a *Staphylococcus capitis* outbreak in a neonatal intensive care unit. *J Perinatol* 27: 713–717.
23. D'Mello D, Daley AJ, Rahman MS, Qu Y, Garland S, et al. (2008) Vancomycin heteroresistance in bloodstream isolates of *Staphylococcus capitis*. *J Clin Microbiol* 46: 3124–3126.
24. French Society for Microbiology (2009) Recommandations du Comité de l'Antibiogramme de la Société Française de Microbiologie. Available at: [www.fimasso.fr/doc/download.php?doc=DiU8C&fic=casfm\\_2009pdf](http://www.fimasso.fr/doc/download.php?doc=DiU8C&fic=casfm_2009pdf) Accessed 22 February 2009.
25. Hall KK, Lyman JA (2006) Updated review of blood culture contamination. *Clin Microbiol Rev* 19: 788–802.
26. European\_Committee\_on\_Antimicrobial\_Susceptibility\_Testing (2010) Rationale for the EUCAST clinical breakpoints, version 2.1. Available at: [http://www.eucast.org/fileadmin/src/media/PDFs/EUCAST\\_files/Rationale\\_documents/Vancomycin\\_rationale\\_2.1.pdf](http://www.eucast.org/fileadmin/src/media/PDFs/EUCAST_files/Rationale_documents/Vancomycin_rationale_2.1.pdf). Accessed 5 October 2010.
27. Courcol R, Herrmann J, Laudat P, Pangon B, Peigue-Lafeuille H (2010) Conservation des souches, sérums et prélèvements biologiques. In: *Référentiel en Microbiologie Médicale*. Paris, France: Société Française de Microbiologie. pp 367.
28. Martineau F, Picard FJ, Ke D, Paradis S, Roy PH, et al. (2001) Development of a PCR assay for identification of staphylococci at genus and species levels. *J Clin Microbiol* 39: 2541–2547.
29. Goering RV (1993) Molecular epidemiology of nosocomial infection: analysis of chromosomal restriction fragment patterns by pulsed-field gel electrophoresis. *Infect Control Hosp Epidemiol* 14: 595–600.
30. George CG, Kloos WE (1994) Comparison of the *Sma*I-digested chromosomes of *Staphylococcus epidermidis* and the closely related species *Staphylococcus capitis* and *Staphylococcus caprae*. *Int J Syst Bacteriol* 44: 404–409.
31. McDougal LK, Steward CD, Killgore GE, Chaitram JM, McAllister SK, et al. (2003) Pulsed-field gel electrophoresis typing of oxacillin-resistant *Staphylococcus aureus* isolates from the United States: establishing a national database. *J Clin Microbiol* 41: 5113–5120.
32. Grundmann H, Hori S, Tanner G (2001) Determining confidence intervals when measuring genetic diversity and the discriminatory abilities of typing methods for microorganisms. *J Clin Microbiol* 39: 4190–4192.
33. Kondo Y, Ito T, Ma XX, Watanabe S, Kreiswirth BN, et al. (2007) Combination of multiplex PCRs for staphylococcal cassette chromosome *mec* type assignment: rapid identification system for *mec*, *ccr*, and major differences in junkyard regions. *Antimicrob Agents Chemother* 51: 264–274.
34. International Working Group on the Classification of Staphylococcal Cassette Chromosome Elements (IWG-SCC) (2009) Classification of staphylococcal cassette chromosome *mec* (SCC*mec*): guidelines for reporting novel SCC*mec* elements. *Antimicrob Agents Chemother* 53: 4961–4967.
35. Vaudaux P, Huggler E, Bernard L, Ferry T, Renzoni A, et al. (2010) Underestimation of vancomycin and teicoplanin MICs by broth microdilution leads to underdetection of glycopeptide-intermediate isolates of *Staphylococcus aureus*. *Antimicrob Agents Chemother* 54: 3861–3870.
36. Nadarajah R, Post LR, Liu C, Miller SA, Sahn DF, et al. (2010) Detection of vancomycin-intermediate *Staphylococcus aureus* with the updated Trek-Sensititre System and the MicroScan System. Comparison with results from the conventional Etest and CLSI standardized MIC methods. *Am J Clin Pathol* 133: 844–848.
37. Satola SW, Farley MM, Anderson KF, Patel JB (2011) Comparison of detection methods for heteroresistant vancomycin-intermediate *Staphylococcus aureus*, with the population analysis profile method as the reference method. *J Clin Microbiol* 49: 177–183.
38. Hiramatsu K, Aritaka N, Hanaki H, Kawasaki S, Hosoda Y, et al. (1997) Dissemination in Japanese hospitals of strains of *Staphylococcus aureus* heterogeneously resistant to vancomycin. *Lancet* 350: 1670–1673.
39. European Committee on Antimicrobial Susceptibility Testing (2010) Clinical breakpoints. Available at: [http://www.eucast.org/clinical\\_breakpoints](http://www.eucast.org/clinical_breakpoints). Accessed 5 October 2010.
40. Réseau d'alerte, d'investigation et de surveillance des infections nosocomiales (Raisin) (2009) Enquête nationale de prévalence des infections nosocomiales, France, juin 2006. Saint-Maurice, France: Institut de Veille Sanitaire. Available at: <http://www.invs.sante.fr/surveillance/raisin/>. Accessed 5 October 2011.
41. Centre de Coordination de la Lutte contre les Infections Associées aux Soins (2011) Rapport de la surveillance 2010 du réseau NEOCAT. Available at: [http://www.cclinparisnord.org/NEOCAT/2010/NEOCAT10\\_Rapport.pdf](http://www.cclinparisnord.org/NEOCAT/2010/NEOCAT10_Rapport.pdf). Accessed 15 October 2011.
42. de Silva GD, Justice A, Wilkinson AR, Buttery J, Herbert M, et al. (2001) Genetic population structure of coagulase-negative staphylococci associated with carriage and disease in preterm infants. *Clin Infect Dis* 33: 1520–1528.
43. Patel SJ, Oshodi A, Prasad P, Delamora P, Larson E, et al. (2009) Antibiotic use in neonatal intensive care units and adherence with Centers for Disease Control and Prevention 12 Step Campaign to Prevent Antimicrobial Resistance. *Pediatr Infect Dis J* 28: 1047–1051.
44. Grisold AJ, Zarfel G, Strenger V, Feiler G, Leitner E, et al. (2010) Use of automated repetitive-sequence-based PCR for rapid laboratory confirmation of nosocomial outbreaks. *J Infect* 60: 44–51.
